# Supplementary material for: Exploring the mechanism of cordycepin combined with doxorubicin in treating glioblastoma based on network pharmacology and biological verification
Source: PubMed Central journal article supplement (PMC8855715; doi:10.7717/peerj.12942), 2022-02-15
Supplement: peerj-10-12942-s001.pdf [file peerj-10-12942-s001.pdf]

Cor 联合 Dox

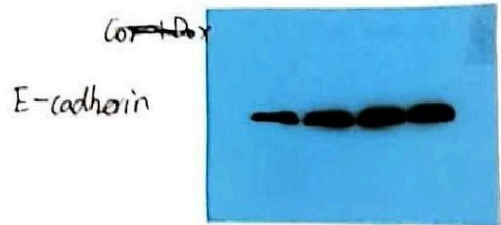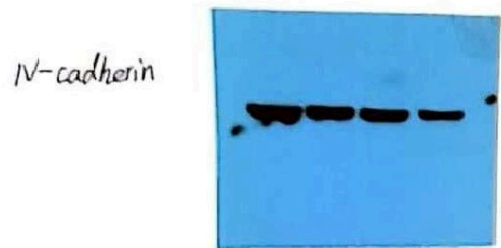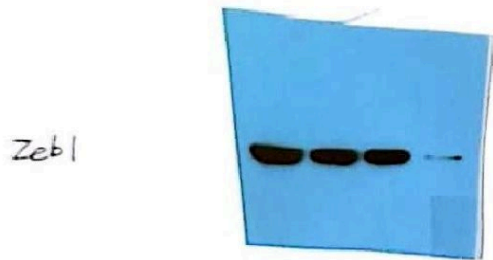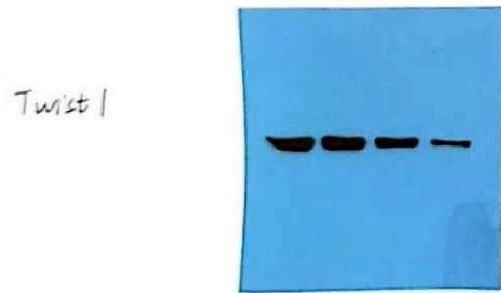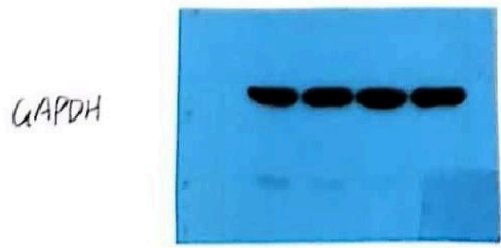

① ② ③ ④

- ① Con
- ② Cor (80 μM)
- ③ Dox (1 μM)
- ④ Cor + Dox

NFKB1

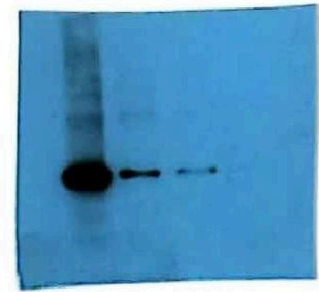

MAPK8

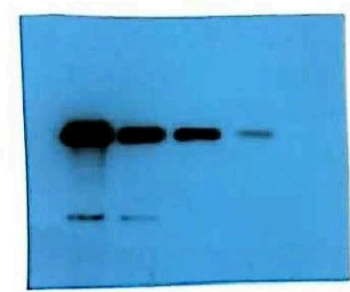

MYC

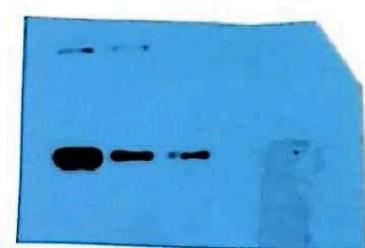

MMP9

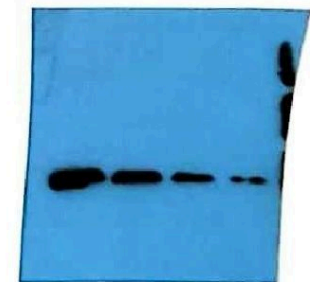

Cleaved Casp 3

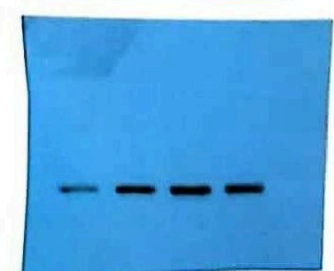

GAPDH

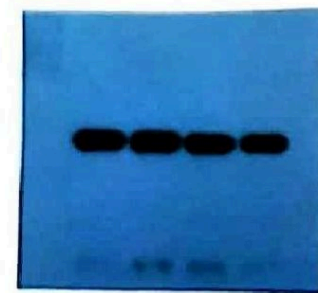

① ② ③ ④

来自 扫描全能王免费版

手机上的文档、证件扫描识别利器

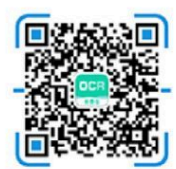

扫描快速下载识别智能设备
