# Supplementary material for: Exploring the mechanism of cordycepin combined with doxorubicin in treating glioblastoma based on network pharmacology and biological verification
Source: PubMed Central journal article supplement (PMC8855715; doi:10.7717/peerj.12942), 2022-02-15

LN-329

Repeat 1

Repeat 2

Con Cor Dox Cor+Dox

Con Cor Dox Cor+Dox

E-cadherin

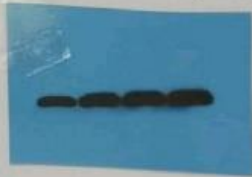

135KD

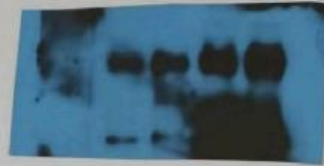

N-cadherin

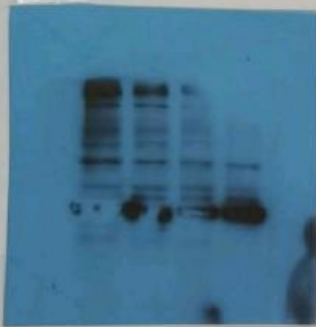

140KD

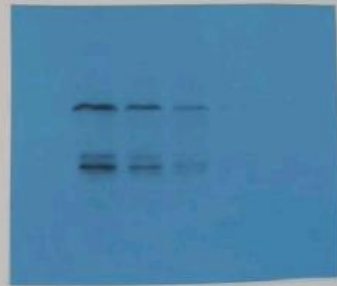

Zeb1

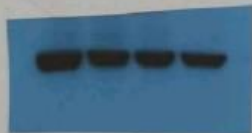

200KD

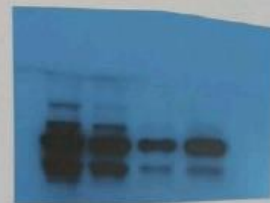

Twist1

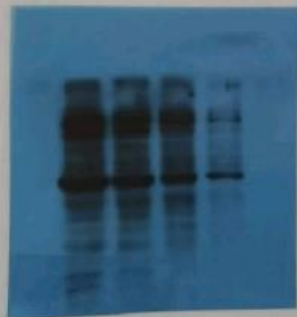

26KD

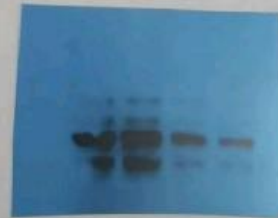

GAPDH

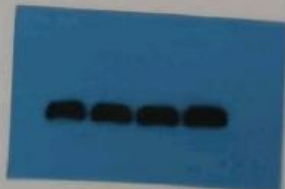

37KD

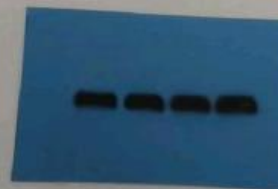

Supplement: peerj-10-12942-s008.pdf [file peerj-10-12942-s008.pdf]
