# Supplementary material for: Exploring the mechanism of cordycepin combined with doxorubicin in treating glioblastoma based on network pharmacology and biological verification
Source: PubMed Central journal article supplement (PMC8855715; doi:10.7717/peerj.12942), 2022-02-15

LN-229

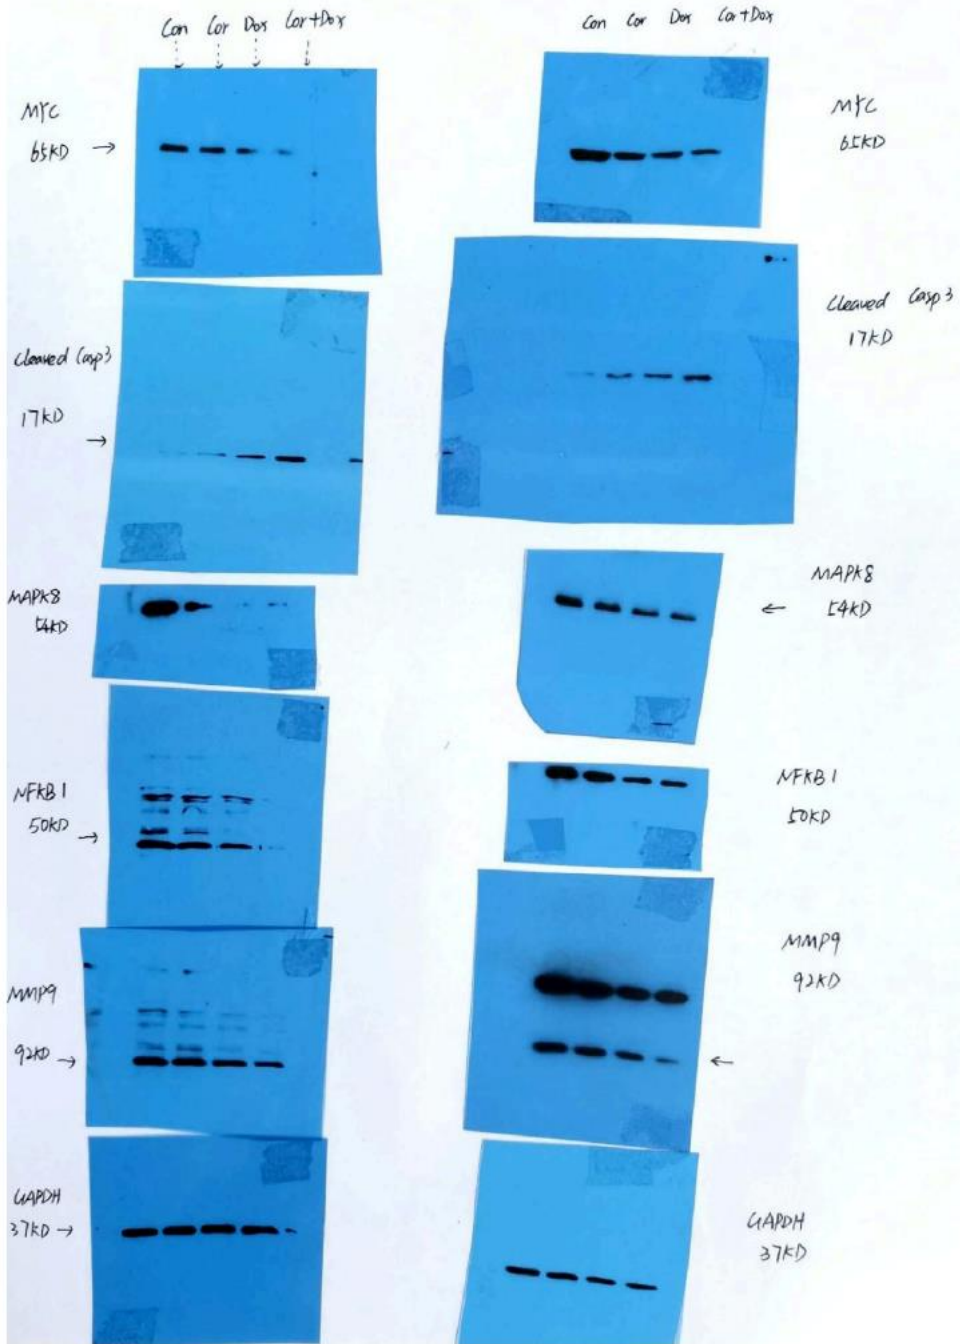

Supplement: peerj-10-12942-s012.pdf [file peerj-10-12942-s012.pdf]
