# Supplementary material for: Exploring the mechanism of cordycepin combined with doxorubicin in treating glioblastoma based on network pharmacology and biological verification
Source: PeerJ. 2022 Feb 15;10:e12942. doi: 10.7717/peerj.12942 (PMC8855715; doi:10.7717/peerj.12942)
Supplement: Supplemental Information 7 — Raw data exported from the Image J applied for data analyses and preparation for the detailed investigation shown Figs. 2 and 6 for the protein. [file peerj-10-12942-s007.xlsx]

## Sheet: Sheet1
E-cadherin				平均	SD
	1	1	1	1	0	CK	14259	1	14393.1	1	14721.8	1
	1.20005	1.3238	1.53657	1.35347	0.170214	Cor	18360.9	1.28767	19197.8	1.33381	23225.6	1.57763
	1.70012	1.85785	1.70981	1.75593	0.0884016	Dox	26478.5	1.85696	27402.2	1.90384	26406.3	1.79368
	1.86709	2.05629	1.87913	1.93417	0.105931	Cor+Dox	30353	2.12869	30403.8	2.11238	28405.5	1.92948
				平均	SD	N-cadherin	第一次		第二次		第三次
N-cadherin	1	1	1	1	0		23508.9	1	23673.7	1	23444.4	1
	0.694328	0.829581	0.81497	0.779626	0.0606091		17514.7	0.745024	19787.8	0.835856	19617.1	0.836747
	0.625456	0.744025	0.723663	0.697714	0.0634007		16060.2	0.683154	18049.8	0.762441	17798.1	0.759162
	0.481206	0.514139	0.509675	0.501674	0.0178651		12897.6	0.548629	12503.6	0.528163	12269.2	0.523332
Zeb1	1	1	1	1	0	Zeb1	21574.9	1	21623	1	21574.3	1
	0.831469	0.815821	0.806726	0.818005	0.0125154		19248.6	0.892178	17773.9	0.821992	17869.6	0.828283
	0.771499	0.835276	0.817845	0.808206	0.0329628		18180.5	0.84267	18508.2	0.855951	18510	0.857964
	0.212886	0.235768	0.236296	0.228317	0.0133659		5236.52	0.242714	5237.06	0.242199	5234.52	0.242628
Twist1	1	1	1	1		Twist1	17482.4	1	17496.3	1	17507	1
	0.915021	0.979938	0.954804	0.949921			17164.7	0.981831	17275	0.987351	17162.4	0.980318
	0.692	0.768924	0.716731	0.725885			13213.8	0.755838	13786.3	0.787956	13163.3	0.75189
	0.421521	0.46756	0.467788	0.45229			8401.69	0.480581	8403.69	0.480313	8408.98	0.480322
GAPDH						GAPDH	18818.2	1	20879.3	1	20901	1
							20192.2	1.07301	21037.2	1.00756	21459.5	1.02672
							20554.2	1.09225	21396.1	1.02475	21926.3	1.04905
							21454.9	1.14011	21448.8	1.02728	21461.1	1.0268
	Control			Cor			Dox			Cor+Dox
E-cadherin	1	1	1	1.20005	1.3238	1.53657	1.70012	1.85785	1.70981	1.86709	2.05629	1.87913
N-cadherin	1	1	1	0.694328	0.829581	0.81497	0.625456	0.744025	0.723663	0.481206	0.514139	0.509675
Zeb1	1	1	1	0.831469	0.815821	0.806726	0.771499	0.835276	0.817845	0.212886	0.235768	0.236296
Twist1	1	1	1	0.915021	0.979938	0.954804	0.692	0.768924	0.716731	0.421521	0.46756	0.467788

## Sheet: SPSS
多重比较
因变量: VAR00002
	(I) VAR00001	(J) VAR00001	平均值差值 (I-J)	标准 错误	显著性	95% 置信区间
						下限	上限
LSD	1	2	-.35347*	0.08945	0.004	-0.5597	-0.1472
		3	-.75593*	0.08945	0	-0.9622	-0.5497
		4	-.93417*	0.08945	0	-1.1404	-0.7279
	2	1	.35347*	0.08945	0.004	0.1472	0.5597
		3	-.40246*	0.08945	0.002	-0.6087	-0.1962
		4	-.58070*	0.08945	0	-0.787	-0.3744
	3	1	.75593*	0.08945	0	0.5497	0.9622
		2	.40246*	0.08945	0.002	0.1962	0.6087
		4	-0.17824	0.08945	0.081	-0.3845	0.028
	4	1	.93417*	0.08945	0	0.7279	1.1404
		2	.58070*	0.08945	0	0.3744	0.787
		3	0.17824	0.08945	0.081	-0.028	0.3845
* 平均值差值的显著性水平为 0.05。

## Sheet: Sheet3
NFKB1	第一次
	29319.7	1	29271.1	1	29493.7	1
	7902.85	0.269541	7851.88	0.268247	7575.34	0.256846
	1758.79	0.0599867	1845.38	0.0630442	1808.08	0.061304
	460.849	0.0157181	456.556	0.0155975	460.556	0.0156154
NFKB1/GAPDH		1	1	1
		0.256896	0.26703	0.248456
		0.0602825	0.0671489	0.0633176
		0.0174359	0.0160743	0.0164077
MAPK9	26653.2	1	26828.9	1	26663.7	1
	12502.6	0.469085	12699.3	0.473345	12611	0.472966
	8438.08	0.316588	8976.32	0.334576	8552.2	0.320743
	872.648	0.0327408	886.234	0.0330328	853.406	0.0320063
		1	1	1
		0.447079	0.471198	0.457517
		0.318149	0.35636	0.331278
		0.0363191	0.0340426	0.0336302
MYC	29494	1	29509.8	1	29745.2	1	29893.1
	10279.5	0.348527	10217.5	0.34624	10238.6	0.344212	10125.1
	4121.33	0.139734	4036.33	0.136779	3981.33	0.133848	3976.91
	349.263	0.0118418	354.12	0.0120001	357.92	0.0120329
		1	1	1
		0.332177	0.34467	0.332969
		0.140423	0.145685	0.138244
		0.013136	0.0123669	0.0126434
MMP9	24576.4	1	25258.8	1	25309.8	1
	16519	0.67215	15807.5	0.625819	16276.3	0.643084
	8260.08	0.336098	8105.66	0.320904	8450.08	0.333865
	4788.1	0.194825	4596.4	0.181972	4782.23	0.188947
		1	1	1
		0.640618	0.622981	0.622079
		0.337755	0.341798	0.344832
		0.216118	0.187535	0.198534
Cleaved Casp3	3765.91	1	3786.15	1	3768.15	1		8534.17
	7673.23	2.03755	7850	2.07335	7436.18	1.97343
	9744.35	2.58751	9793.52	2.58667	9787.17	2.59734		5862.52
	9803.42	2.6032	9815.42	2.59245	9845.88	2.61292		5448.05
		1	1	1
		1.94196	2.06394	1.90897
		2.60027	2.75508	2.68265
		2.88771	2.6717	2.74549
