# Supplementary material for: Exploring the mechanism of cordycepin combined with doxorubicin in treating glioblastoma based on network pharmacology and biological verification
Source: PeerJ. 2022 Feb 15;10:e12942. doi: 10.7717/peerj.12942 (PMC8855715; doi:10.7717/peerj.12942)
Supplement: Supplemental Information 9 — Raw data of wound healing assay of three glioblastoma cell lines: LN-229, U251 and T98G. Raw data exported from the Image J applied for data analyses and preparation for Figs. 2A, 2B, 2E and 2F. [file peerj-10-12942-s009.xlsx]

## Sheet: LN 229
Treatment	CK	Cor	Dox	Cor+Dox
Cell igration rate/%	1	0.892377	0.874052	0.598935	第一次
	1	0.874415	0.783576	0.589883	第二次
	1	0.871716	0.773967	0.493395	第三次
AVERAGE	1	0.879502	0.810532	0.560738
SD	0	0.0112308	0.0552192	0.0584955
LN229
第一次
0h			48h		迁移率
CK	1.274		CK	0	1
Cor	1.338		Cor	0.144	0.892377
Dox	1.318		Dox	0.166	0.874052
Cor+Dox	1.314		Cor+Dox	0.527	0.598935
第二次
0h			48h		迁移率
CK	1.238		CK	0	1
Cor	1.282		Cor	0.161	0.874415
Dox	1.303		Dox	0.282	0.783576
Cor+Dox	1.285		Cor+Dox	0.527	0.589883
第三次
0h			48h
CK	1.252		CK	0	1
Cor	1.294		Cor	0.166	0.871716
Dox	1.283		Dox	0.29	0.773967
Cor+Dox	1.287		Cor+Dox	0.652	0.493395

## Sheet: T98G
	T98G
		0h			48h
	CK	12199			0		1
		11774			0		1
		11713			0		1
	COR+DOX	13089			11553		0.11735
		12311			11115		0.0971489
		13074			12074		0.0764877
		T98G
		CK	COR+DOX
	Cell igration rate/%	1	0.11735	第一次
		1	0.0971489	第二次
		1	0.0764877	第三次
	AVERAGE		0.0969957
	SD		0.0204318

## Sheet: U251
	U251
		0h		48h
	CK	14209		1839		0.870575
		14209		1795		0.873672
		13551		1723		0.872851
	COR+DOX	15805		12602		0.202657
		14807		11028		0.255217
		15327		11323		0.261238
		U251
		CK	COR+DOX
	Cell igration rate/%	0.870575	0.202657
		0.873672	0.255217
		0.872851	0.261238
	AVERAGE		0.239704
	SD		0.0322245
